# Supplementary material
Source: PubMed Central journal article supplement (PMC8210465)
Supplement: NIHMS1703640-supplement-Supplemental_Material.pdf [file NIHMS1703640-supplement-Supplemental_Material.pdf]

## SUPPLEMENTAL MATERIAL

### SUPPLEMENTAL METHODS

#### **Measurement of serum creatinine and Cystatin C, and estimation of glomerular**

**filtration rate:** Serum creatinine was measured by enzymatic method (Cobas 8000; Roche Diagnostics, Indianapolis, IN). Serum Cystatin C was measured using a particle enhanced immune turbidimetric assay (Cobas Integra 400 plus; Roche Diagnostics, Indianapolis, IN).  $eGFR_{Cys}$  and  $eGFR_{Cr}$  were calculated using CKD Epidemiology Collaboration (CKD-EPI) CysC equation<sup>25</sup> and Modification of Diet in Renal Disease (MDRD)<sup>26</sup>, respectively. We selected the MDRD equation as it was previously used in other studies that investigated renal function in patients with LVAD and after heart transplant<sup>51,52</sup>.

Specifically,  $eGFR_{Cr}$  was calculated using the following equation:  $eGFR_{Cr} = 175 \times S_{Cr}^{-1.154} \times age^{-0.203} \times 1.212$  (if patient is black)  $\times 0.742$  (if female);  $eGFR_{Cys}$  was calculated using the following equation:  $eGFR_{Cys} = 133 \times \min(S_{Cys}/0.8, 1)^{-0.499} \times \max(S_{Cys}/0.8, 1)^{1.328} \times 0.996^{Age} \times 0.932$  [if female];  $S_{Cys}$  is standardized serum cystatin C; min = indicates the minimum of  $S_{Cys}/0.8$  or 1; max = indicates the maximum of  $S_{Cys}/0.8$  or 1.

**Measurements of plasma and serum biomarkers:** Trimethylamine-*N*-oxide was measured in plasma using ultra performance Liquid Chromatography-tandem Mass Spectrometry (after protein precipitation using deuterated (D9)-TMAO as the internal standard. LC-MS analysis was performed on a platform comprising Eksigent UPLC 100

integrated to API 4000) mass spectrometer controlled by Analyst 1.6 (ABSciex, Foster City, CA).

Serum CRP was measured using a high sensitivity (0.3mg/L) particle enhanced turbidimetric assay on the automated analyzer, Integra 400 plus (Roche Diagnostics, Indianapolis, IN). Serum TNF- $\alpha$  was assessed using a high sensitivity Enzyme Linked Immunoassay (ELISA) kit (RD systems, Minneapolis, MN). Plasma LPS was measured using a LAL chromogenic endotoxin quantitation kit (Pierce Thermochemical, Rockford, IL).

**Stool collection:** Patients provided non-fasting stool samples in sterile stool hats using a protocol similar to the Human Microbiome Project<sup>53</sup>. Samples were transferred to the Columbia University Irving Medical Center (CUIMC) Microbiome Core Lab, processed, aliquoted and stored at -80°C within 12 hours of collection.

**DNA extraction and sequencing:** DNA was extracted from stool using the MagAttract PowerSoil DNA Kit on an Eppendorf epMotion 5075 Liquid Handling Workstation. For bacterial sequencing, we amplified the V3-V4 regions of the 16S rRNA gene using standard primers with Illumina Nextera adaptors (Illumina, Madison WI). PCR products were purified using Agencourt AMPure XP beads (Beckman Coulter, Jersey City NJ) and quantified using the Quant-iT Broad Range dsDNA Assay kit (Thermo Fisher Scientific, Waltham, MA). Libraries were normalized and pooled with a 10% PhiX spike and sequenced on an Illumina MiSeq with a v3 kit. Negative controls were included on all sequencing runs.

# SUPPLEMENTAL FIGURES AND FIGURE LEGENDS

**A**

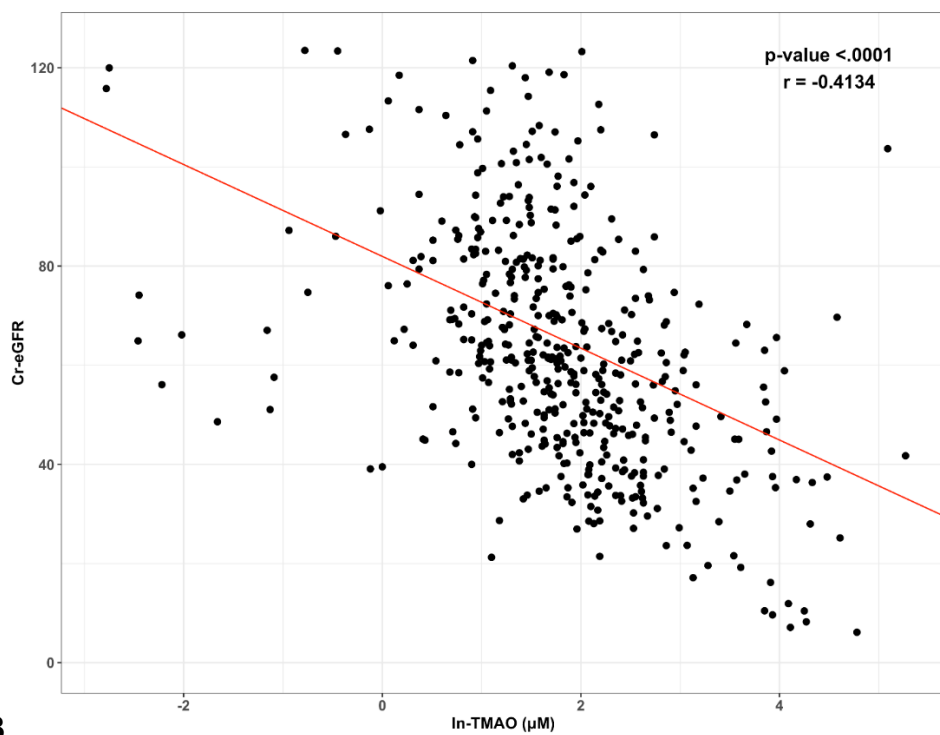

**B**

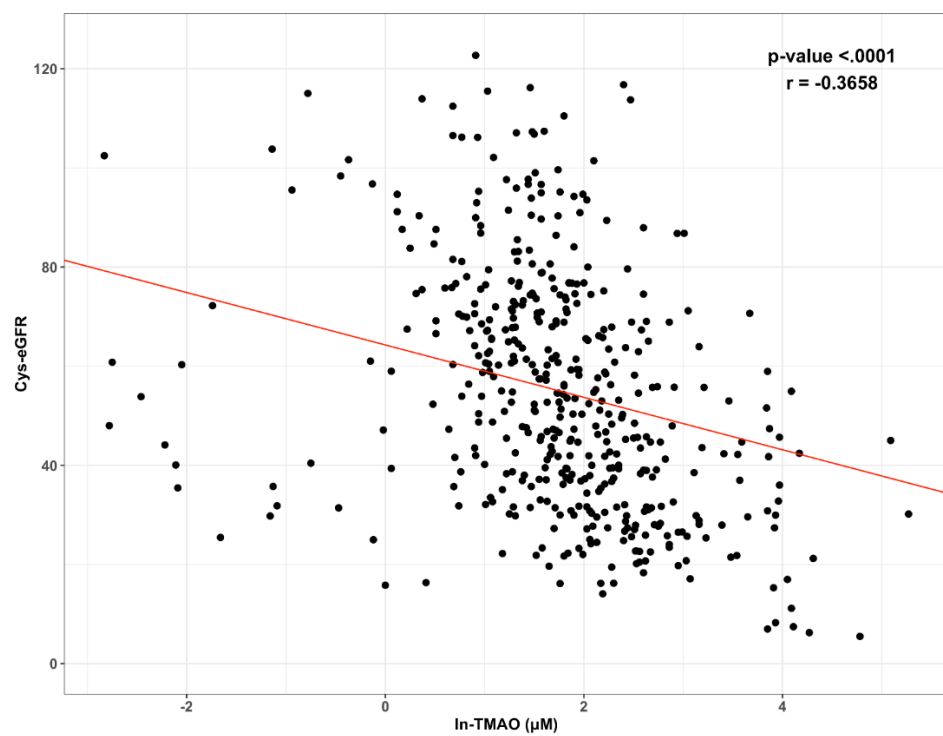

**Supplemental Figure I:** Correlation between circulating TMAO and indices of renal function

(A) ln-TMAO and  $eGFR_{Cr}$ , (B) ln-TMAO and  $eGFR_{Cys}$ ,  $eGFR_{Cr}$ , creatinine based estimated glomerular filtration rate;  $eGFR_{Cys}$ , cystatin C based estimated glomerular filtration state

**A**

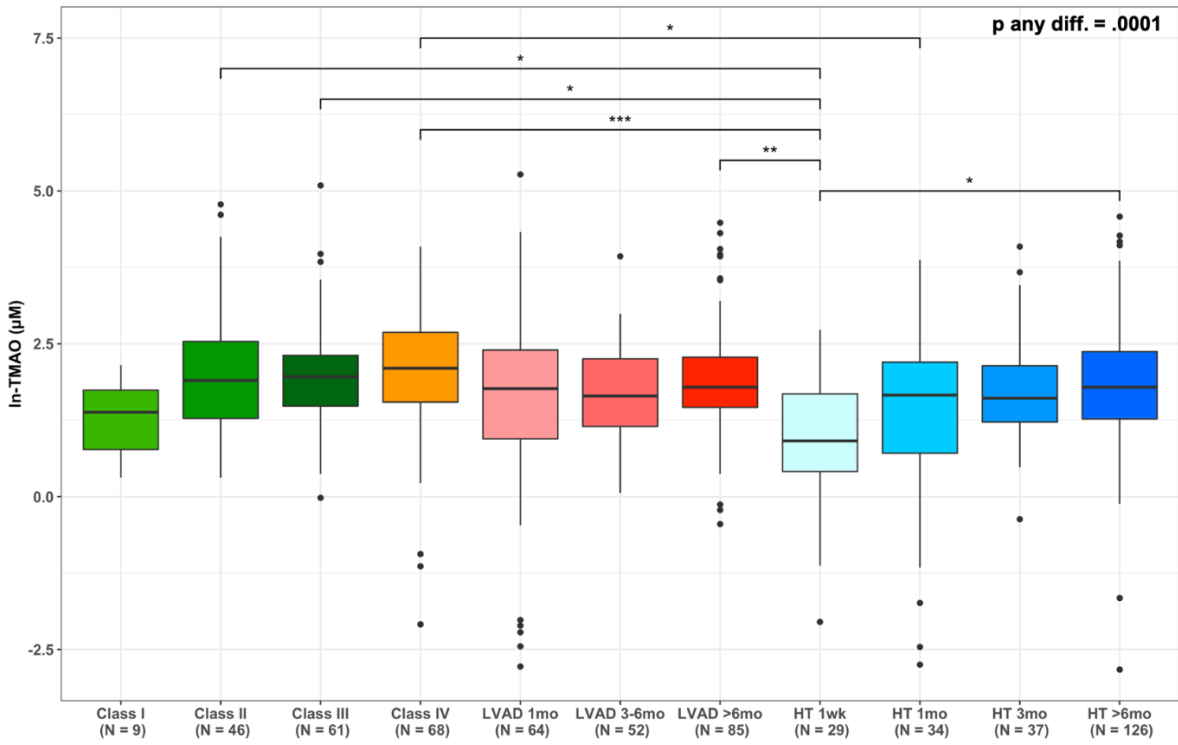

**B**

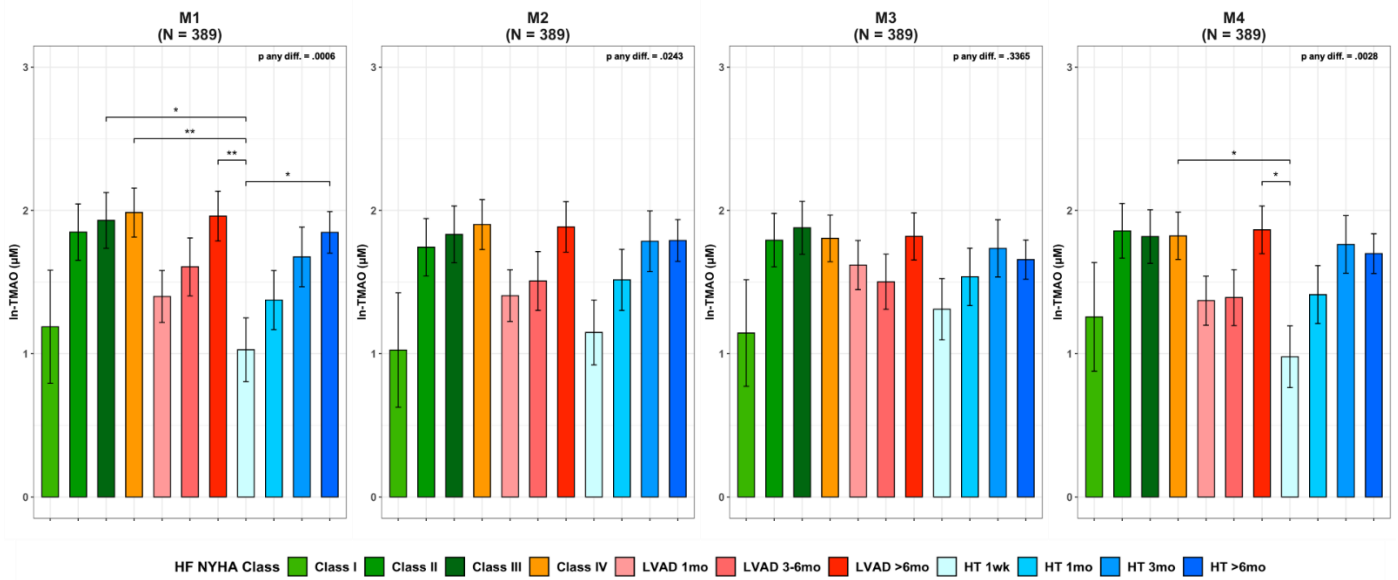

**Supplemental Figure II.** Variation in circulating TMAO across disease categories of Heart Failure, LVAD and Heart Transplant patients (only patients with concurrent measure of serum creatinine and Cystatin C were included N=389). **(A)** unadjusted In-TMAO levels **(M0)**; **(B)** adjusted least squared means: **M1**: adjusted for age, sex, race/ethnicity; **M2**: adjusted for Model 1 and antibiotics use one month prior to stool collection; **M3**: adjusted for Model 2 plus serum creatinine estimated glomerular filtration rate (eGFR<sub>Cr</sub>); **M4**: adjusted for Model 2 plus Cystatin C estimated glomerular filtration rate (eGFR<sub>Cys</sub>);  
p-value: \* 0.05-0.01; \*\* 0.01-0.001; \*\*\* <0.001;  
HF, heart failure; HT, heart transplant; LVAD, left ventricular assist device.

**A**

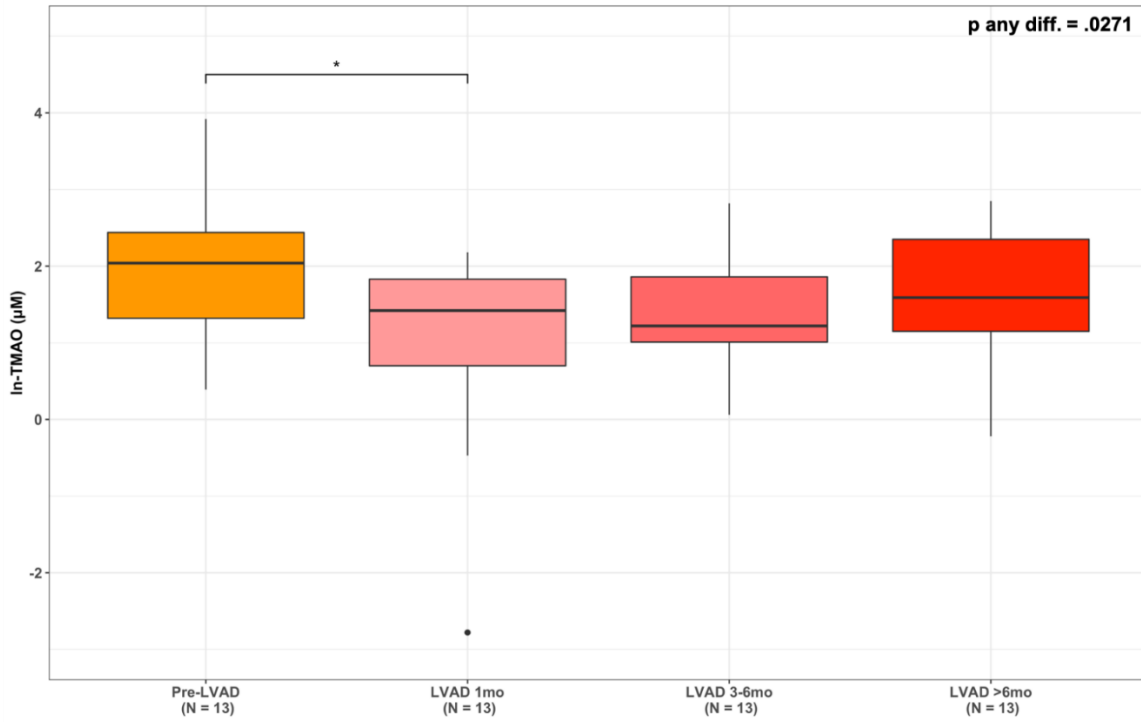

**B**

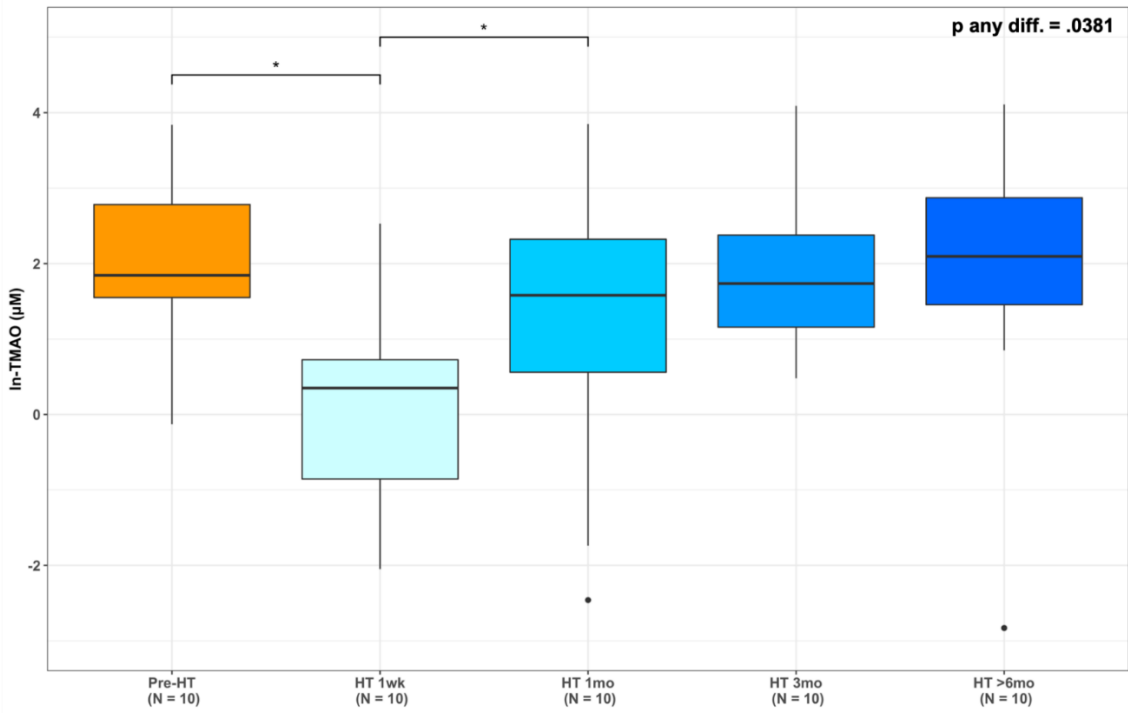

**Supplemental Figure III:** Variation in circulating TMAO in a subset of patients with longitudinally collected data at all time points **(A)** pre- and post-LVAD (N=13), p-value for any difference based on unadjusted linear mixed model  $<0.05$ ; and **(B)** pre- and post-HT (N=10); p-value for any difference based on unadjusted linear mixed model  $< 0.05$ .

p-value: \* 0.05-0.01;

LVAD, left ventricular assist device; HT, heart transplant.



**A**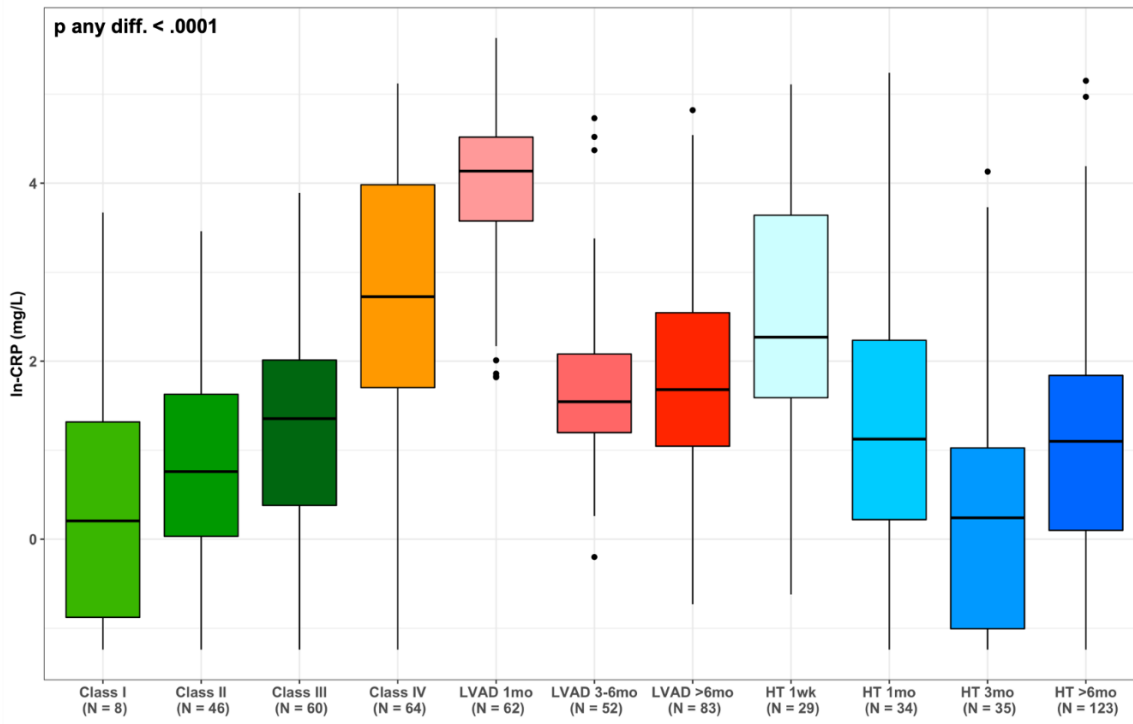**B**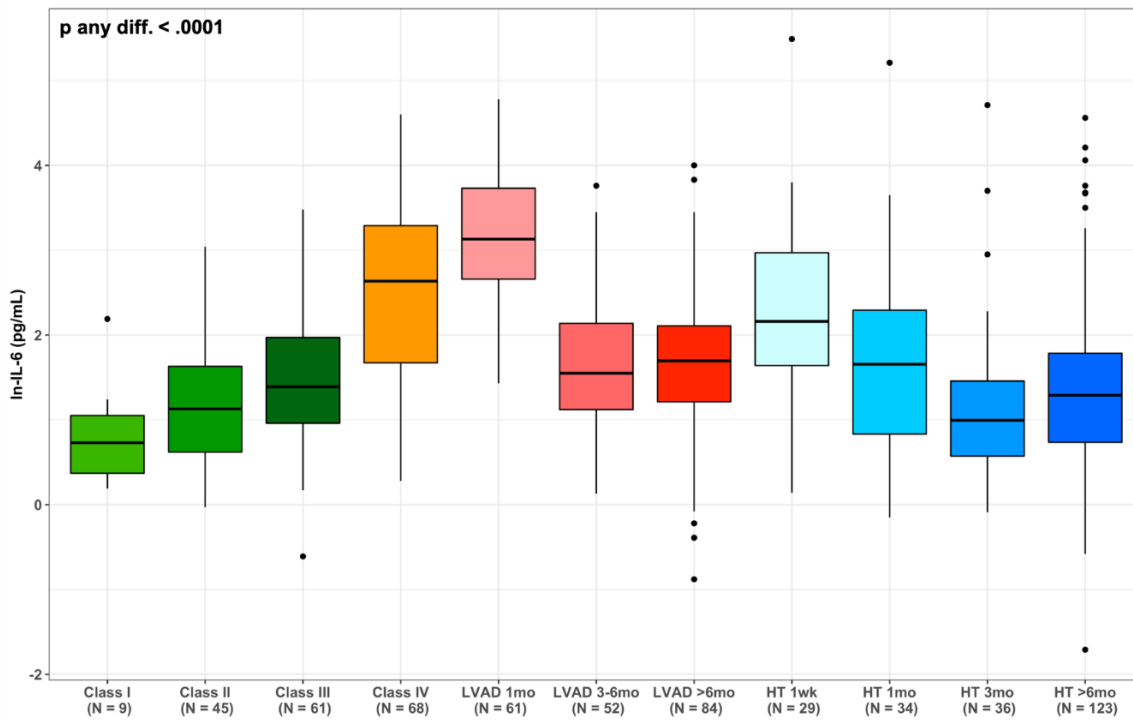

**C**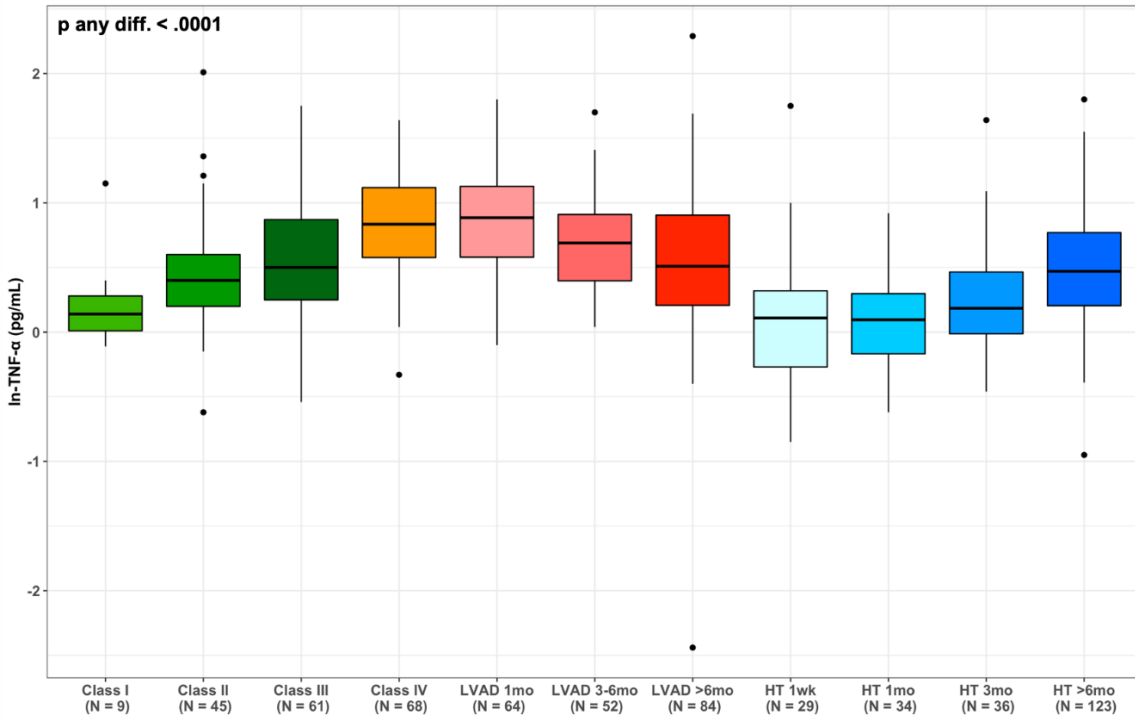**D**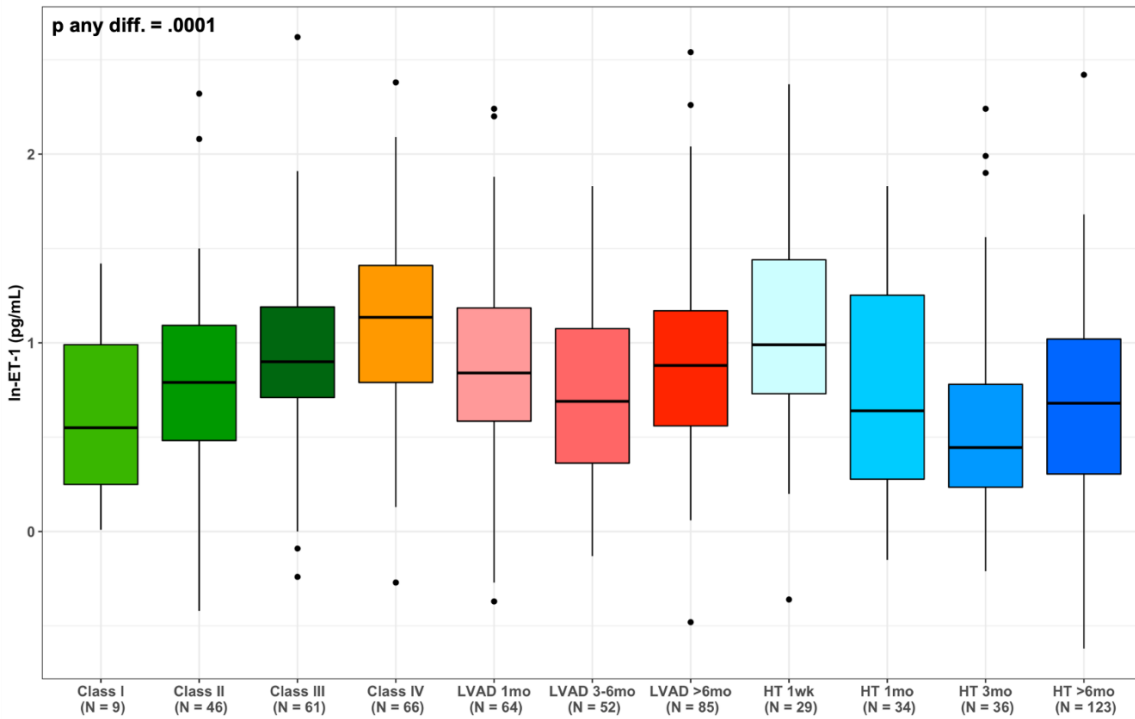

**E**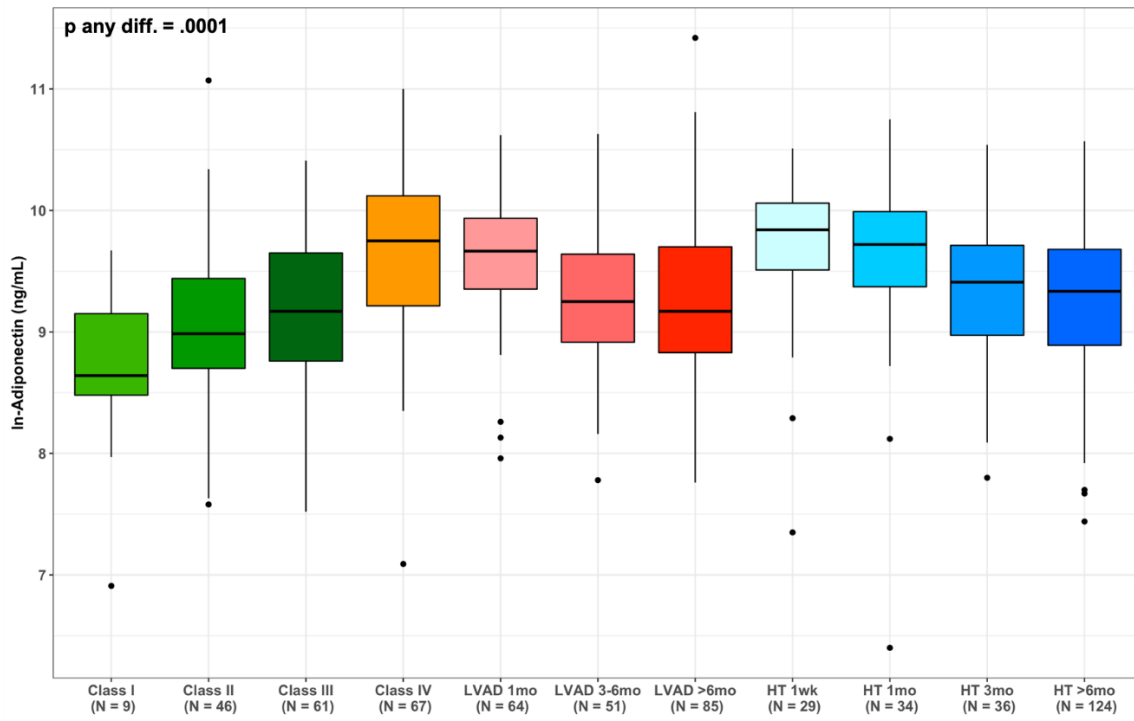**F**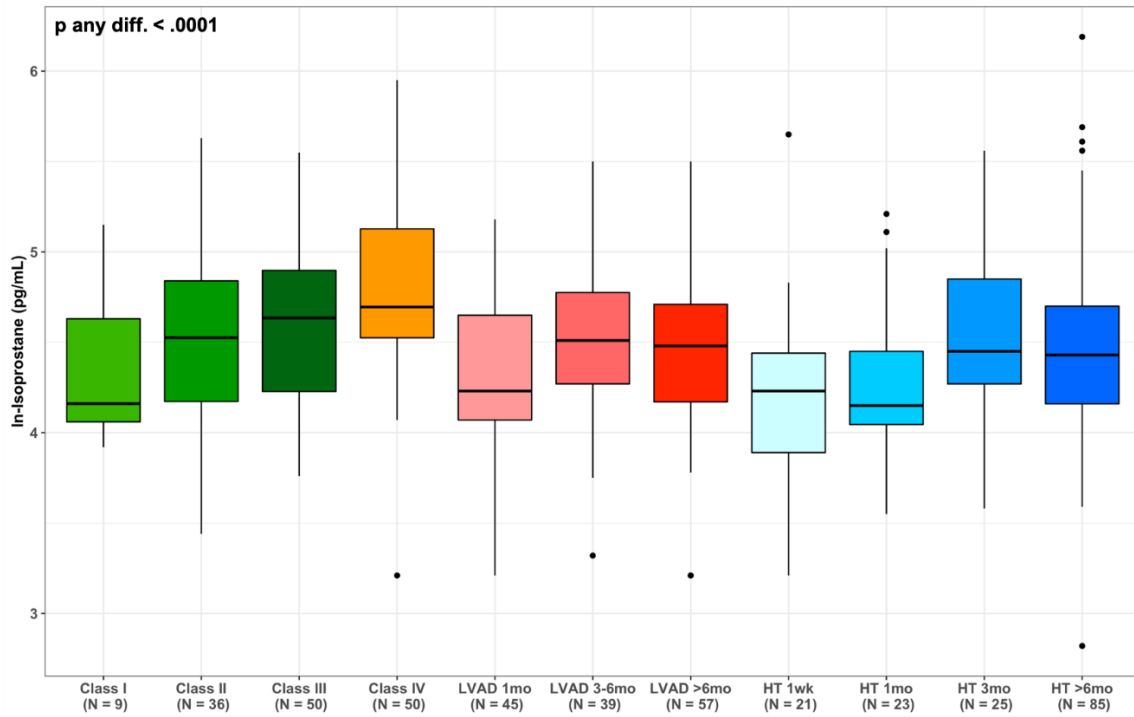

**G**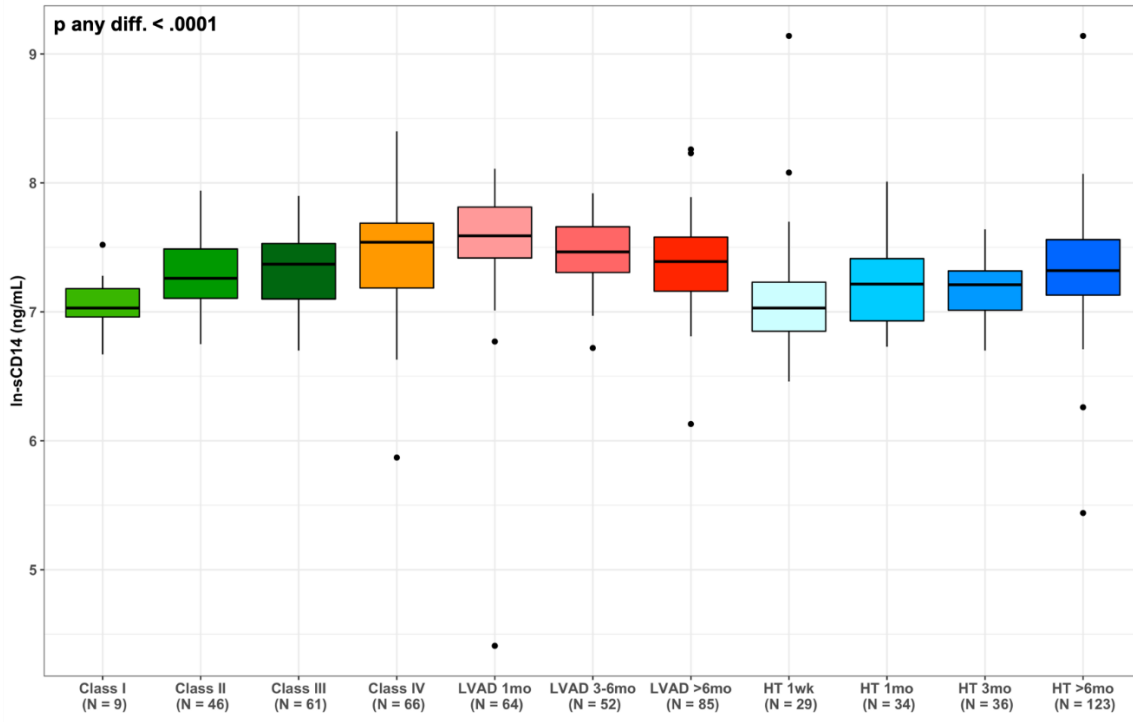**H**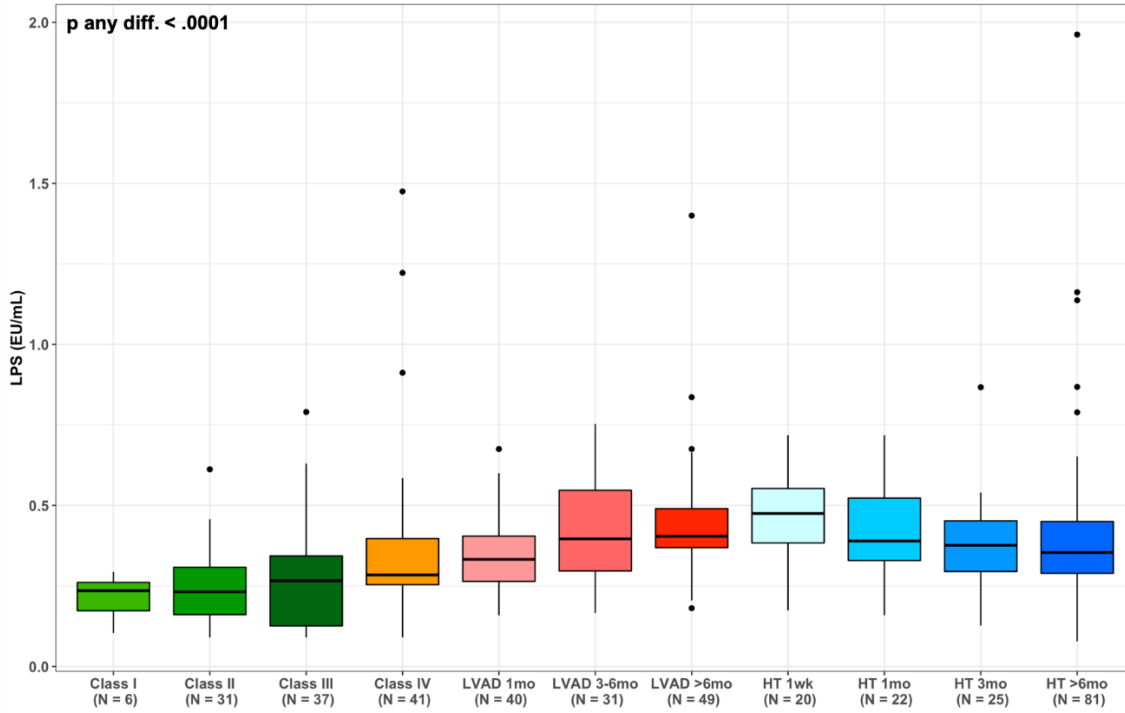

**Supplemental Figure IV:** Variation in circulating biomarkers of inflammation, oxidative stress and endotoxemia across disease categories (HF Class I, II, III, IV), LVAD (1month, 3-6month, >6 month), HT (1 week, 1 month, 3 month, >6 month). **(A)** CRP. **(B)** IL-6. **(C)** TNF- $\alpha$ . **(D)** ET-1. **(E)** Adiponectin. **(F)** Isoprostane. **(G)** sCD14. **(H)** LPS.

CRP, C-reactive protein; ET-1 endothelin-1; IL-6, interleukin-6; LPS, lipopolysaccharide; sCD14 soluble CD14; TNF-  $\alpha$ , tumor necrosis factor alpha. HF, heart failure; LVAD, left ventricular assist device; HT, heart transplantation.

**A**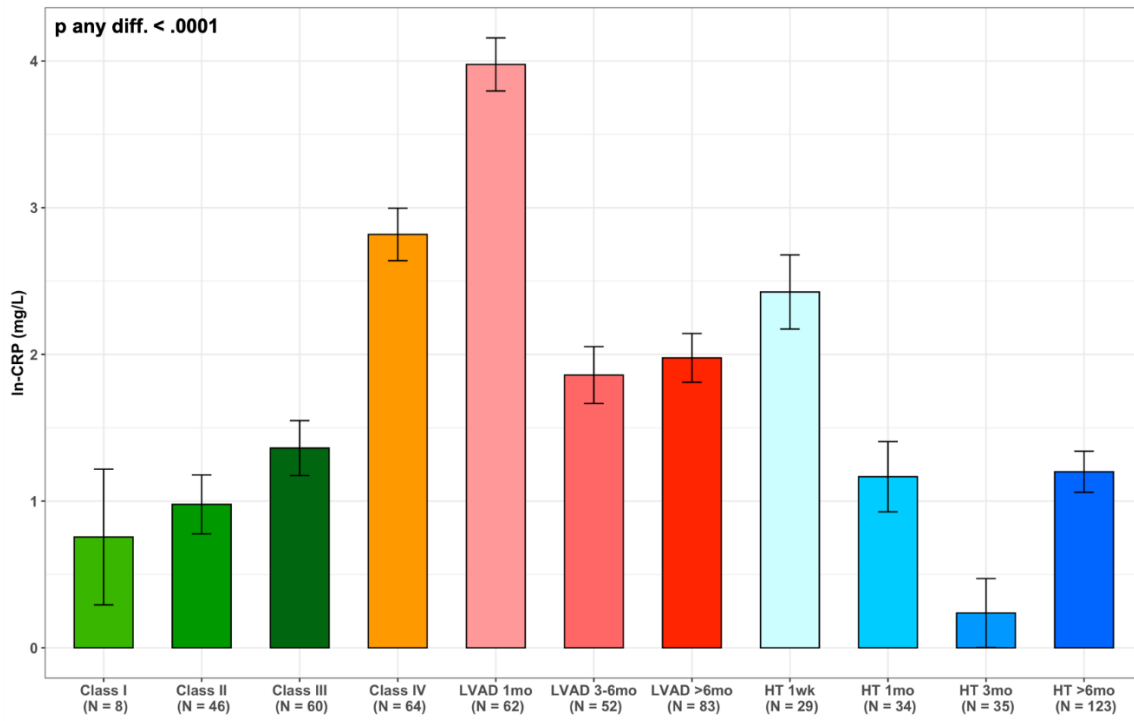**B**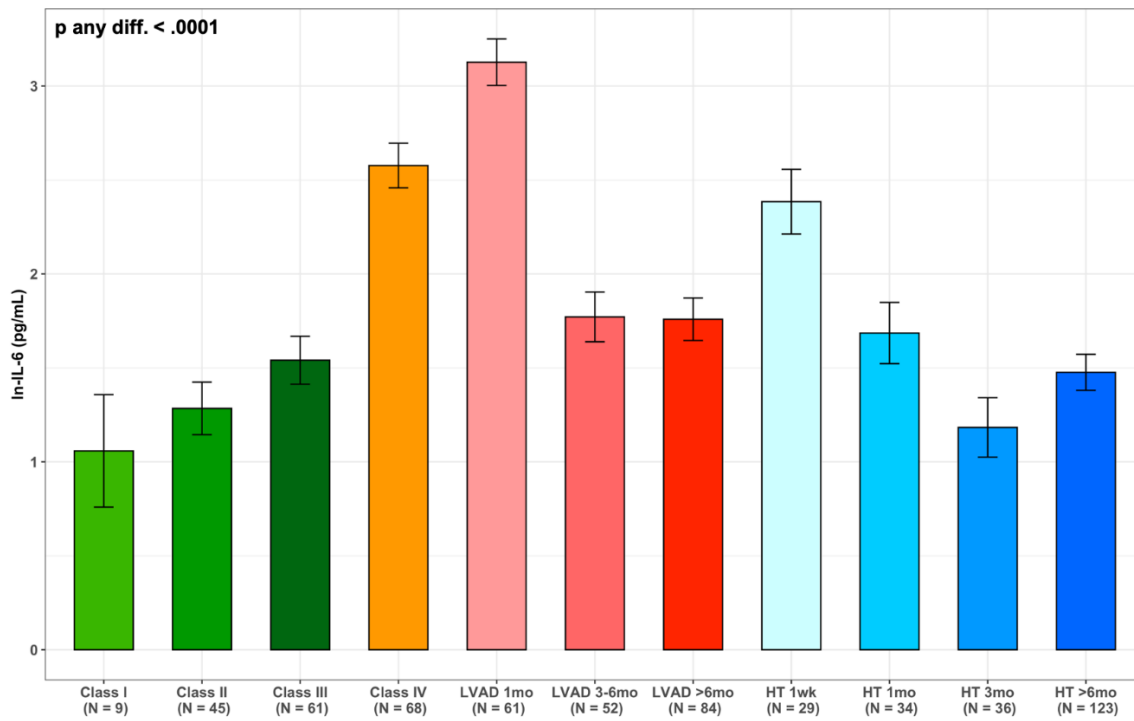

**C**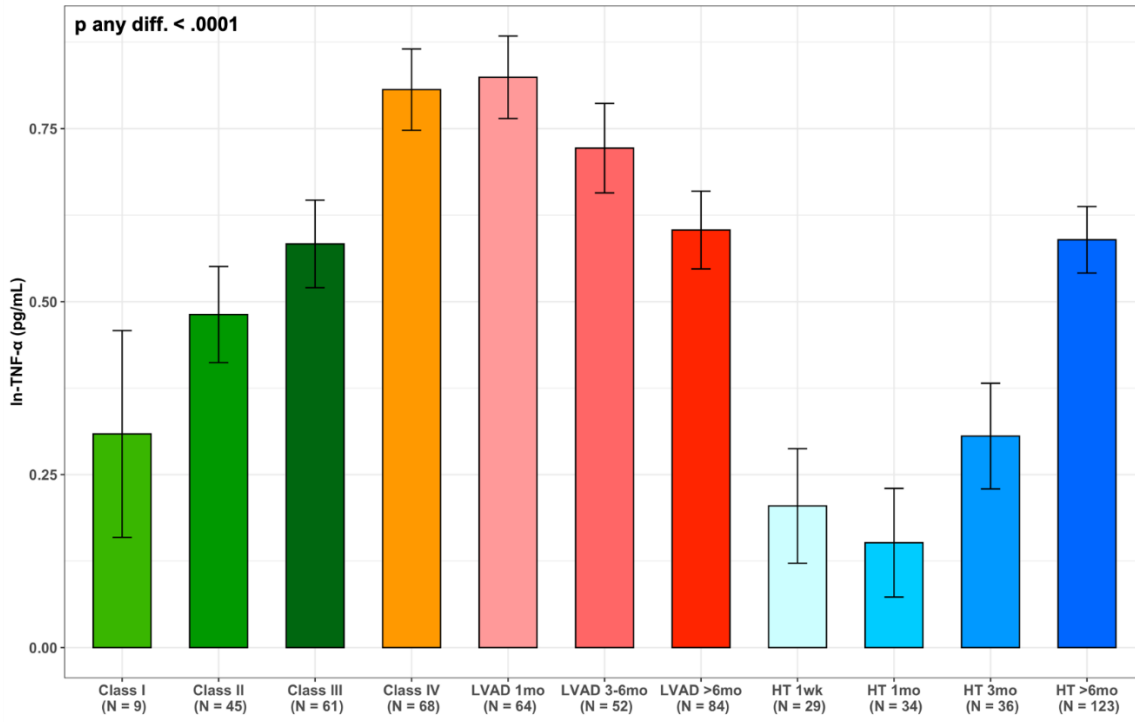**D**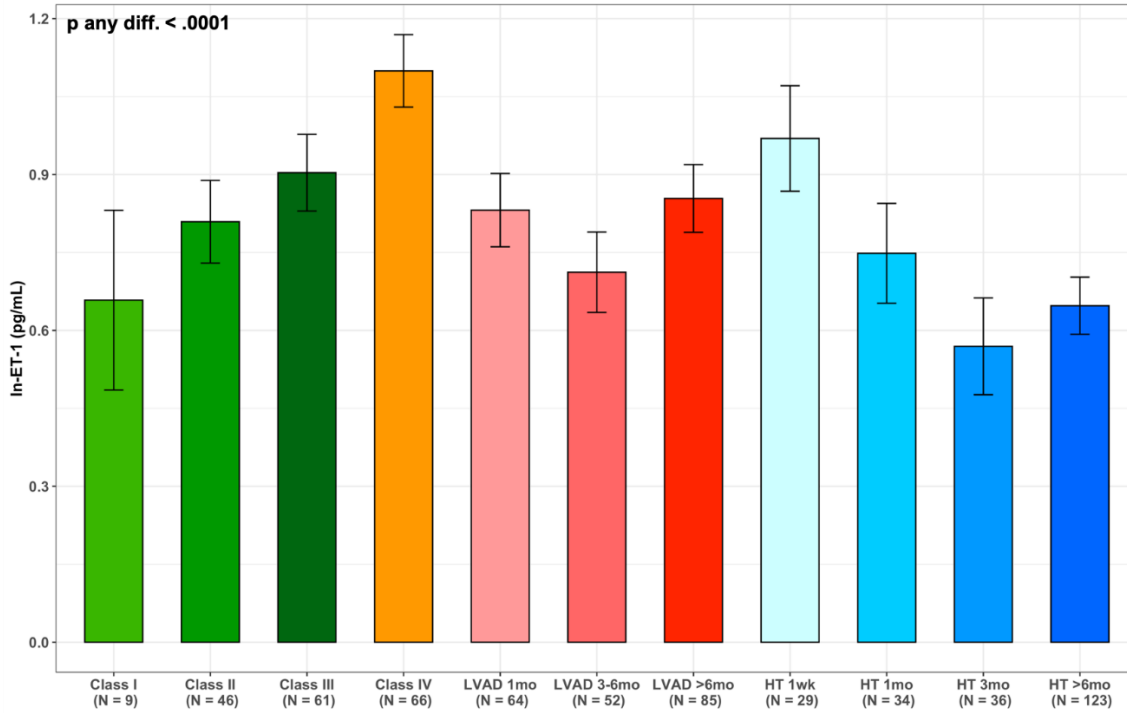

**E**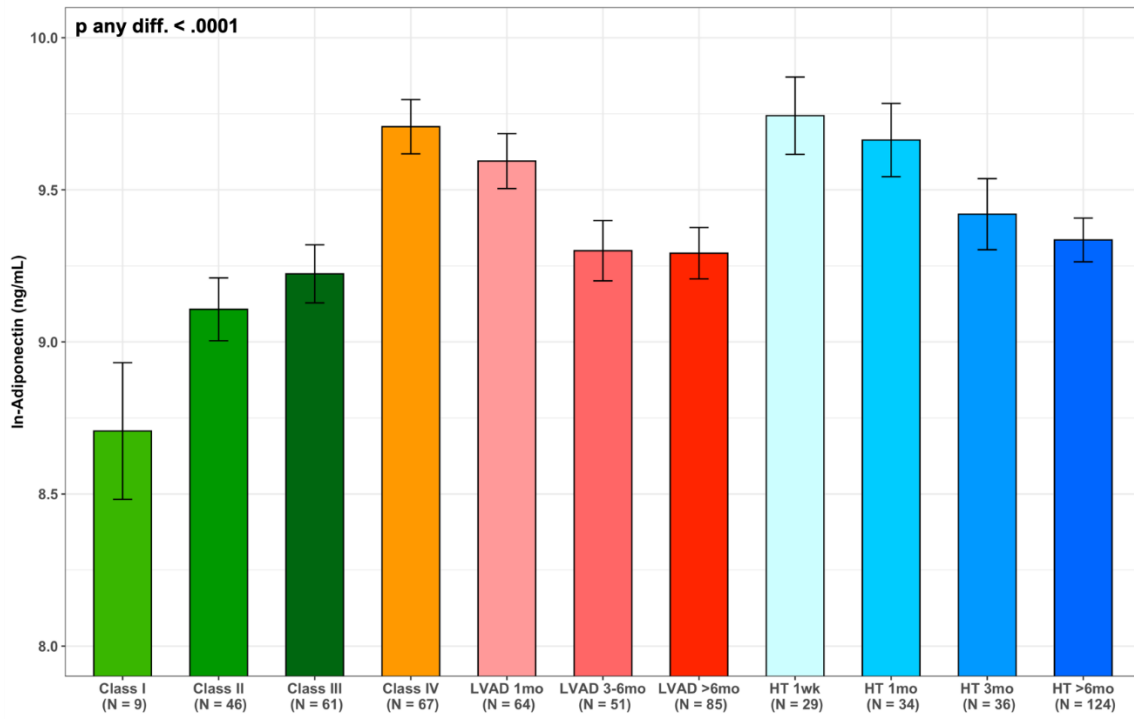**F**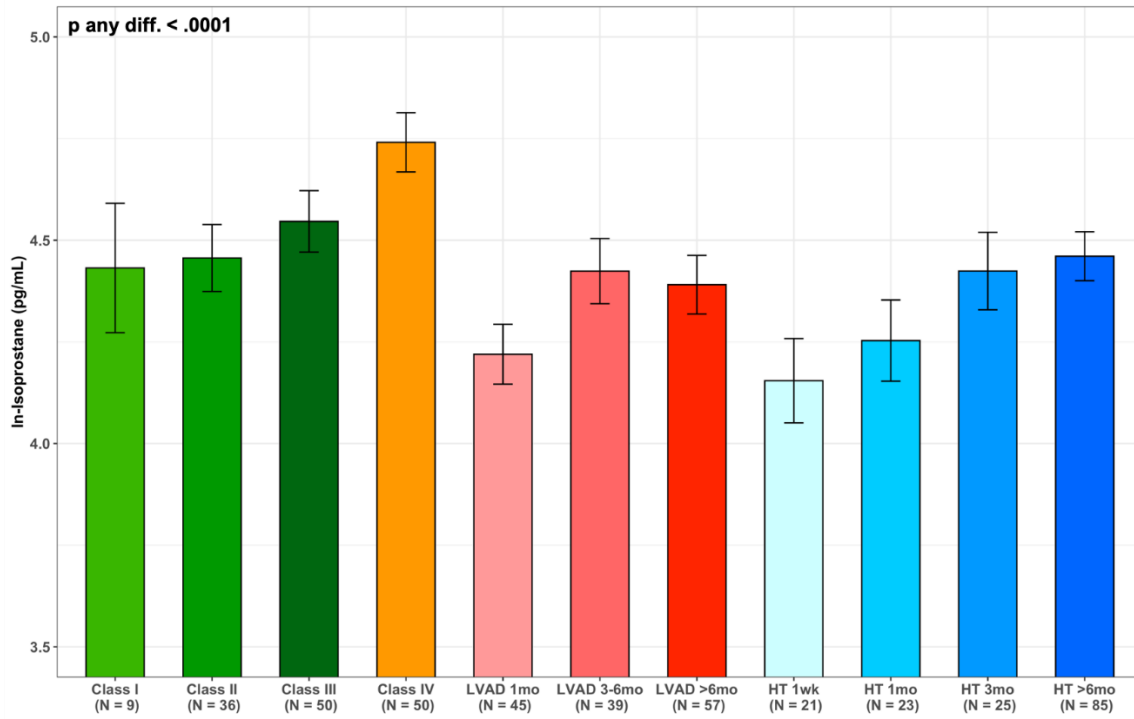



**G**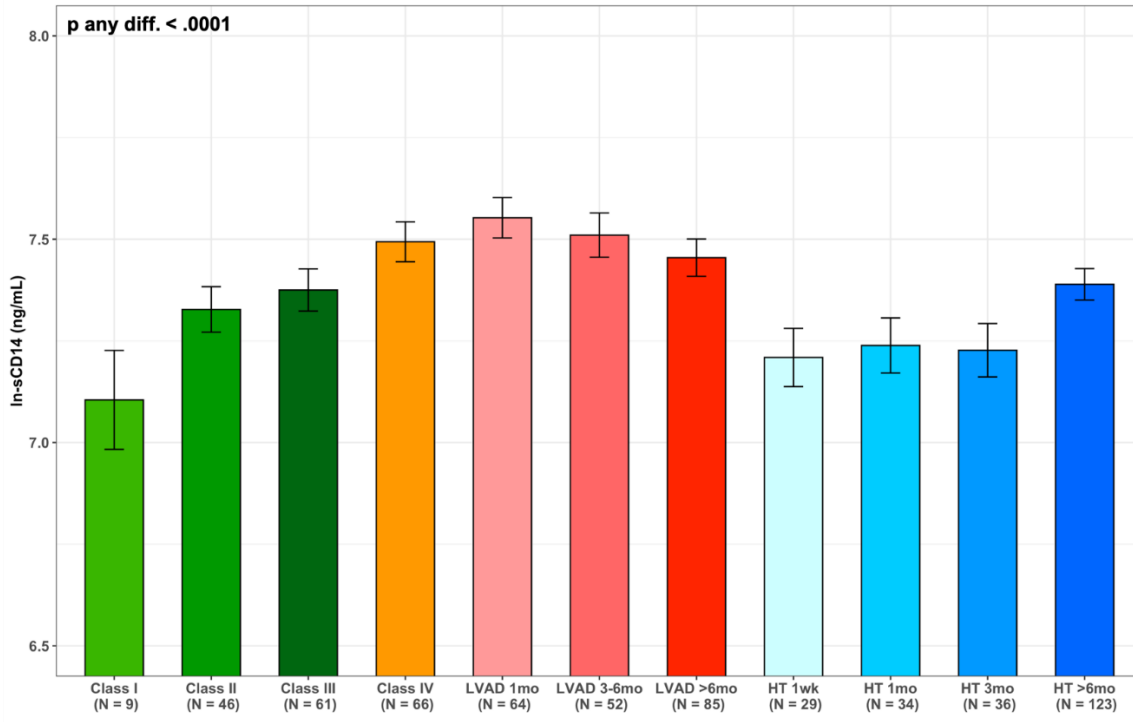**H**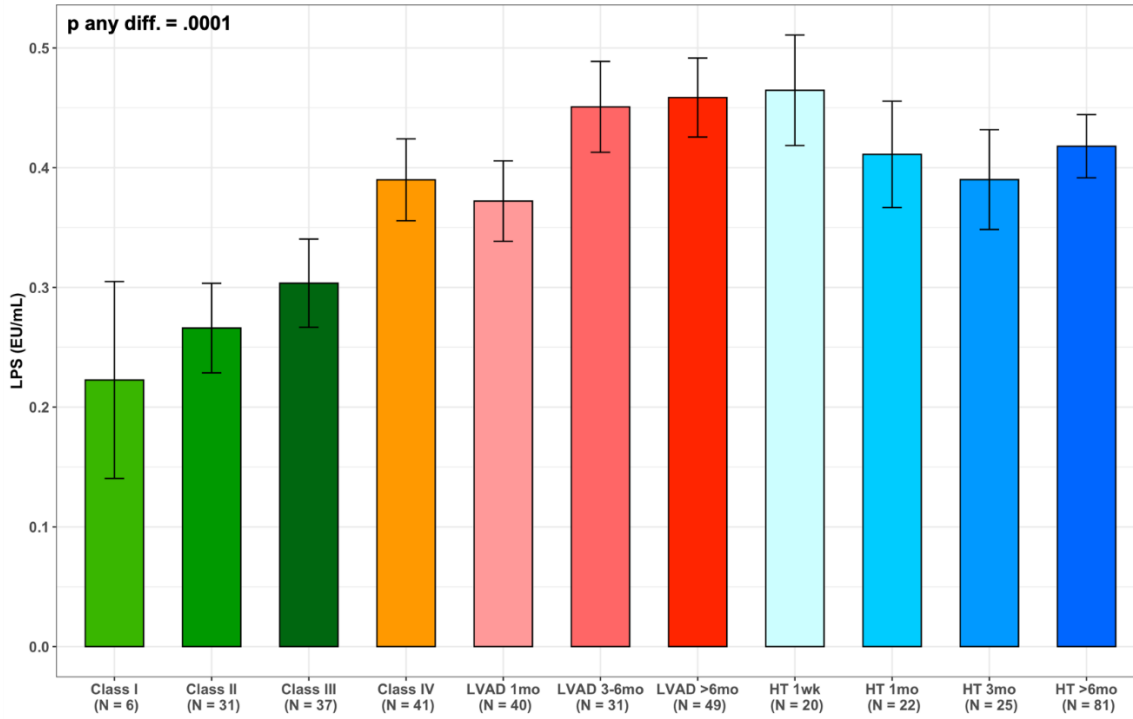

**Supplemental Figure V:** Adjusted least squared means of circulating biomarkers of inflammation, oxidative stress and endotoxemia across disease categories (HF Class I, II, III, IV), LVAD (1month, 3-6month, >6 month), HT (1 week, 1 month, 3 month, >6 month). **(A)** CRP. **(B)** IL-6. **(C)** TNF- $\alpha$ . **(D)** ET-1. **(E)** Adiponectin. **(F)** Isoprostane. **(G)** sCD14. **(H)** LPS; Adjusted for age, sex, race/ethnicity, and antibiotics use one month prior to stool collection **(M2)**; CRP, C-reactive protein; ET-1 endothelin-1; IL-6, interleukin-6; LPS, lipopolysaccharide; sCD14 soluble CD14; TNF-  $\alpha$ , tumor necrosis factor alpha. HF, heart failure; LVAD, left ventricular assist device; HT, heart transplantation.

**A**

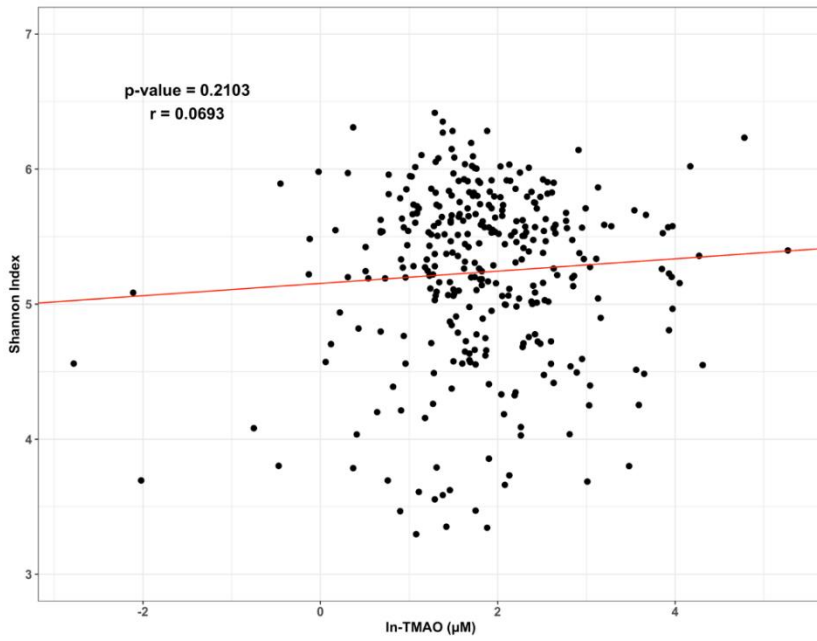

**B**

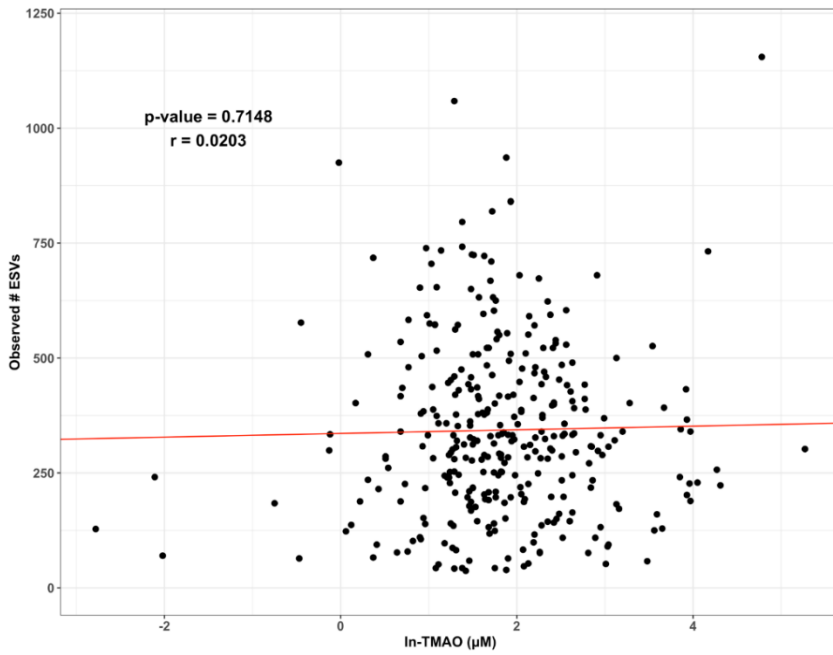

**Supplemental Figure VI:** Correlation between TMAO and gut alpha diversity metrics. **(A)**

Shannon Index and **(B)** number of observed of ESVs.

## SUPPLEMENTAL TABLES

**Supplemental Table I: Baseline Characteristics of HF Patients Providing Stool Samples**

| Study cohorts                                   | NYHA Class I | NYHA Class II | NYHA Class III | NYHA Class IV | P-value |
|-------------------------------------------------|--------------|---------------|----------------|---------------|---------|
| Number of samples<br>(N=97)                     | 7            | 29            | 31             | 30            |         |
| <b>Demographic and clinical characteristics</b> |              |               |                |               |         |
| Age (years)                                     | 61.1 ± 15.2  | 61.2 ± 12.9   | 63.5 ± 12.9    | 59.6 ± 13.5   | 0.71    |
| Male                                            | 6 (85.7%)    | 21 (72.4%)    | 25 (80.6%)     | 28 (93.3%)    | 0.20    |
| Race                                            |              |               |                |               | 0.04    |
| White                                           | 1 (14.3%)    | 15 (51.7%)    | 20 (64.5%)     | 14 (46.7%)    |         |
| Black                                           | 2 (28.6%)    | 8 (27.6%)     | 7 (22.6%)      | 7 (23.3%)     |         |
| Hispanic                                        | 3 (42.9%)    | 1 (3.4%)      | 3 (9.7%)       | 2 (6.7%)      |         |
| Other                                           | 1 (14.3%)    | 5 (17.2%)     | 1 (3.2%)       | 7 (23.3%)     |         |
| Smoking                                         | 3 (42.9%)    | 15 (51.7%)    | 16 (51.6%)     | 14 (46.7%)    | 0.95    |
| Etiology, Ischemic                              | 2 (28.6%)    | 14 (48.3%)    | 20 (64.5%)     | 12 (40.0%)    | 0.16    |
| Hypertension                                    | 4 (57.1%)    | 21 (72.4%)    | 16 (51.6%)     | 19 (63.3%)    | 0.42    |
| Diabetes                                        | 1 (14.3%)    | 9 (31.0%)     | 10 (32.3%)     | 9 (30.0%)     | 0.82    |
| Atrial fib/flutter                              | 1 (14.3%)    | 9 (31.0%)     | 14 (45.2%)     | 18 (60.0%)    | 0.05    |
| Stroke                                          | 0 (0.0%)     | 1 (3.4%)      | 4 (12.9%)      | 1 (3.3%)      | 0.30    |

| <b>Laboratory parameters</b>                        |             |             |             |              |        |
|-----------------------------------------------------|-------------|-------------|-------------|--------------|--------|
| BUN (mg/dl)                                         | 16.0 ± 2.4  | 25.5 ± 12.2 | 25.9 ± 9.0  | 30.4 ± 18.3  | 0.12   |
| Serum Cr (mg/dl)                                    | 1.1 ± 0.3   | 1.6 ± 1.8   | 1.3 ± 0.3   | 1.4 ± 0.4    | 0.64   |
| Serum CysC (mg/liter)                               | 1.1 ± 0.1   | 1.6 ± 1.4   | 1.5 ± 0.5   | 1.7 ± 0.5    | 0.40   |
| eGFR <sub>Cr</sub> (ml/min/1.73m <sup>2</sup> )     | 73.8 ± 20.0 | 63.0 ± 26.0 | 61.6 ± 18.7 | 60.2 ± 23.4  | 0.62   |
| eGFR <sub>Cys</sub><br>(ml/min/1.73m <sup>2</sup> ) | 72.2 ± 14.2 | 57.4 ± 24.0 | 54.4 ± 22.3 | 46.9 ± 21.8  | 0.05   |
| NT-ProBNP (ng/l)                                    | 443         | 721         | 2418        | 2945         | <0.001 |
| Median [IQR]                                        | [255, 751]  | [197, 2267] | [1123,4917] | [1817,4606]  |        |
| Na (mmol/l)                                         | 142.3 ± 2.7 | 140.7 ± 3.5 | 140.2 ± 3.7 | 136.7 ± 5.0  | 0.001  |
| AST (U/L)                                           | 26.2 ± 17.1 | 21.5 ± 9.1  | 25.8 ± 13.9 | 53.5 ± 91.5  | 0.14   |
| ALT (U/L)                                           | 24.7 ± 16.4 | 22.1 ± 13.6 | 28.5 ± 27.1 | 83.7 ± 191.1 | 0.18   |
| Total Bilirubin (mg/dl)                             | 0.5 ± 0.1   | 0.5 ± 0.3   | 0.8 ± 0.4   | 1.0 ± 0.4    | <0.001 |
| LDH (U/L)                                           | 215 ± 96.1  | 230 ± 71.8  | 290 ± 116.4 | 312 ± 125.0  | 0.26   |
| <b>Biomarkers</b>                                   |             |             |             |              |        |
| In-CRP (mg/L)                                       | 0.9 ± 1.9   | 0.9 ± 1.4   | 1.3 ± 1.3   | 2.6 ± 1.5    | <0.001 |
| In-IL-6 (pg/mL)                                     | 1.0 ± 0.6   | 1.2 ± 0.7   | 1.4 ± 0.7   | 2.4 ± 1.0    | <0.001 |
| In-TNF-α (pg/mL)                                    | 0.3 ± 0.4   | 0.5 ± 0.4   | 0.6 ± 0.4   | 0.8 ± 0.4    | 0.001  |
| In-ET-1 (pg/mL)                                     | 0.7 ± 0.5   | 1.0 ± 0.5   | 1.1 ± 0.5   | 1.1 ± 0.5    | 0.27   |
| In-Adiponectin (ng/mL)                              | 8.6 ± 0.8   | 8.9 ± 0.7   | 9.3 ± 0.6   | 9.7 ± 0.7    | <0.001 |
| In-Isoprostane (pg/mL)                              | 4.4 ± 0.3   | 4.5 ± 0.5   | 4.7 ± 0.4   | 4.8 ± 0.4    | 0.06   |
| In-sCD14 (ng/mL)                                    | 7.1 ± 0.2   | 7.3 ± 0.2   | 7.3 ± 0.3   | 7.4 ± 0.3    | 0.02   |

|                            |            |            |            |            |       |
|----------------------------|------------|------------|------------|------------|-------|
| LPS (EU/mL)                | 0.2 ± 0.1  | 0.2 ± 0.1  | 0.2 ± 0.1  | 0.4 ± 0.3  | 0.04  |
| <b>Medications</b>         |            |            |            |            |       |
| ASA                        | 5 (71.4%)  | 24 (82.8%) | 18 (58.1%) | 18 (60.0%) | 0.16  |
| Coumadin                   | 0 (0.0%)   | 2 (6.9%)   | 8 (25.8%)  | 3 (10.0%)  | 0.09  |
| ACEi                       | 3 (42.9%)  | 10 (34.5%) | 9 (29.0%)  | 2 (6.7%)   | 0.04  |
| ARB                        | 4 (57.1%)  | 9 (31.0%)  | 15 (48.4%) | 3 (10.0v)  | 0.006 |
| Aldosterone<br>Antagonists | 4 (57.1%)  | 18 (62.1%) | 23 (74.2%) | 20 (66.7%) | 0.72  |
| β-blockers                 | 7 (100.0%) | 28 (96.6%) | 28 (90.3%) | 21 (70.0%) | 0.011 |
| Statins                    | 4 (57.1%)  | 14 (48.3%) | 17 (54.8%) | 19 (63.3%) | 0.71  |
| Loop diuretics             | 5 (71.4%)  | 23 (79.3%) | 27 (87.1%) | 24 (80.0%) | 0.74  |
| Digoxin                    | 2 (28.6%)  | 4 (13.8%)  | 7 (22.6%)  | 8 (26.7%)  | 0.63  |
| Antibiotics*               | 0 (0.0%)   | 4 (13.8%)  | 4 (12.9%)  | 7 (23.3%)  | 0.40  |

NYHA, New York Heart Association; BMI, body mass index; AST, aspartate transaminase; ALT, alanine transaminase, LDH, lactate dehydrogenase; NT-proBNP, N-terminal prohormone B-type natriuretic peptide; Cr, Creatinine; CysC, Cystatin C; eGFR, estimated glomerular filtration rate; TNF-α, tumor necrosis factor alpha; sCD14, soluble CD14; IL-6, interleukin-6; CRP, C-reactive protein; ET-1, endothelin-1; LPS, lipopolysaccharide; ASA, acetylsalicylic acid; ACE, angiotensin-converting enzyme; ARB, angiotensin receptor blocker. Data presented n (%) or mean ± SD as appropriate, unless otherwise noted.

\* Antibiotic use is defined as any antibiotic use that was indicated for infection that was estimated to have occurred 1 month before stool collection.

**Supplemental Table II: Baseline Characteristics of LVAD Patients Providing Stool Samples**

| Study cohorts                                   | LVAD<br>(1mo) | LVAD<br>(3-6mo) | LVAD<br>(>6mo) | P-value |
|-------------------------------------------------|---------------|-----------------|----------------|---------|
| Number of samples (N=120)                       | 37            | 31              | 52             |         |
| <b>Demographic and clinical characteristics</b> |               |                 |                |         |
| Age (years)                                     | 58.6 ± 12.2   | 59.1 ± 14.3     | 58.9 ± 14.1    | <0.001  |
| Male                                            | 32 (86.5%)    | 26 (83.9%)      | 43 (82.7%)     | 0.89    |
| Race                                            |               |                 |                | 0.19    |
| White                                           | 26 (70.3%)    | 22 (71.0%)      | 33 (63.5%)     |         |
| Black                                           | 5 (13.5%)     | 6 (19.4%)       | 15 (28.8%)     |         |
| Hispanic                                        | 1 (2.7%)      | 2 (6.5%)        | 3 (5.8%)       |         |
| Other                                           | 5 (13.5%)     | 1 (3.2%)        | 1 (1.9%)       |         |
| BMI (kg/m <sup>2</sup> )                        | 28.7          | 26.1            | 28.0           | 0.50    |
| Median [IQR]                                    | [21.7, 29.4]  | [24.6, 30.1]    | [24.9, 32.2]   |         |
| Smoking                                         | 24 (64.9%)    | 19 (61.3%)      | 27 (51.9%)     | 0.44    |
| Etiology, Ischemic                              | 23 (62.2%)    | 13 (41.9%)      | 19 (36.5%)     | 0.05    |
| INTERMACS Profile                               |               |                 |                | 0.76    |
| 1                                               | 2 (5.4%)      | 2 (6.5%)        | 3 (5.8%)       |         |
| 2                                               | 20 (54.1%)    | 18 (58.1%)      | 29 (55.8%)     |         |
| 3                                               | 8 (21.6%)     | 10 (32.3%)      | 14 (26.9%)     |         |

|                                                  |              |             |              |        |
|--------------------------------------------------|--------------|-------------|--------------|--------|
| 4                                                | 3 (8.1%)     | 1 (3.2%)    | 2 (3.8%)     |        |
| 5-7 or not provided                              | 4 (10.8%)    | 0 (0.0%)    | 4 (7.7%)     |        |
| Hypertension                                     | 24 (64.9%)   | 17 (54.8%)  | 30 (57.7%)   | 0.68   |
| Diabetes                                         | 14 (37.8%)   | 11 (35.5%)  | 19 (36.5%)   | 0.98   |
| Atrial Fib/flutter                               | 18 (48.6%)   | 14 (45.2%)  | 26 (50.0%)   | 0.91   |
| Stroke                                           | 0 (0.0%)     | 2 (6.5%)    | 6 (11.5%)    | 0.10   |
| Time after LVAD, months                          | 0.7          | 5.13        | 11.9         | <0.001 |
| Median [IQR]                                     | [0.6, 1.1]   | [3.9, 6.2]  | [10.1, 16.2] |        |
| <b>Laboratory parameters</b>                     |              |             |              |        |
| BUN (mg/dl)                                      | 18.4 ± 10.5  | 23.3 ± 11.2 | 24.4 ± 11.3  | <0.001 |
| Serum Cr (mg/dl)                                 | 1.2 ± 0.5    | 1.3 ± 0.5   | 1.5 ± 1.0    | <0.001 |
| Serum CysC (mg/l)                                | 1.5 ± 0.5    | 1.6 ± 0.6   | 1.6 ± 0.8    | 0.10   |
| eGFR <sub>Cr</sub> (ml/min/1.73m <sup>2</sup> )  | 80.0 ± 41.6  | 63.9 ± 24.0 | 60.2 ± 24.4  | <0.001 |
| eGFR <sub>Cys</sub> (ml/min/1.73m <sup>2</sup> ) | 53.1 ± 22.0  | 49.7 ± 22.5 | 56.0 ± 27.6  | 0.05   |
| NT-ProBNP (ng/l)                                 | 3116         | 1289        | 905          | <0.001 |
| Median [IQI]                                     | [2255, 4262] | [580, 2117] | [454, 2014]  |        |
| Na (mmol/l)                                      | 135.8 ± 4.2  | 140.4 ± 3.2 | 140.0 ± 3.0  | <0.001 |
| AST (U/L)                                        | 26.6 ± 9.5   | 26.1 ± 11.6 | 23.5 ± 8.5   | 0.36   |
| ALT (U/L)                                        | 25.8 ± 13.3  | 20.3 ± 10.8 | 18.7 ± 8.4   | 0.02   |
| Total Bilirubin (mg/dl)                          | 0.8 ± 0.8    | 0.5 ± 0.2   | 0.6 ± 0.3    | 0.04   |
| LDH (U/L)                                        | 340 ± 108.2  | 316 ± 97.6  | 320 ± 121.0  | 0.43   |
| <b>Biomarkers</b>                                |              |             |              |        |



|                         |            |            |            |        |
|-------------------------|------------|------------|------------|--------|
| In-CRP (mg/L)           | 3.9 ± 0.9  | 1.6 ± 1.0  | 1.5 ± 1.1  | <0.001 |
| In-IL-6 (pg/mL)         | 3.2 ± 0.8  | 1.7 ± 0.8  | 1.6 ± 0.8  | <0.001 |
| In-TNF-α (pg/mL)        | 0.9 ± 0.3  | 0.7 ± 0.4  | 0.5 ± 0.5  | <0.001 |
| In-ET-1 (pg/mL)         | 1.0 ± 0.6  | 0.8 ± 0.5  | 0.8 ± 0.5  | 0.35   |
| In-Adiponectin (ng/mL)  | 9.6 ± 0.5  | 9.3 ± 0.6  | 9.2 ± 0.8  | 0.01   |
| In-Isoprostane (pg/mL)  | 4.3 ± 0.4  | 4.5 ± 0.4  | 4.4 ± 0.5  | 0.07   |
| In-sCD14 (ng/mL)        | 7.6 ± 0.3  | 7.5 ± 0.2  | 7.3 ± 0.3  | 0.004  |
| LPS (EU/mL)             | 0.3 ± 0.1  | 0.4 ± 0.2  | 0.5 ± 0.2  | 0.01   |
| <b>Medications</b>      |            |            |            |        |
| ASA                     | 35 (94.6%) | 26 (83.9%) | 34 (65.4%) | 0.003  |
| Coumadin                | 17 (45.9%) | 29 (93.5%) | 44 (84.6%) | <0.001 |
| ACEi                    | 3 (8.1%)   | 10 (32.3%) | 14 (26.9%) | 0.04   |
| ARB                     | 1 (2.7%)   | 3 (9.7%)   | 15 (28.8%) | 0.002  |
| Aldosterone Antagonists | 15 (40.5%) | 14 (45.2%) | 17 (32.7%) | 0.50   |
| β-blockers              | 20 (54.1%) | 28 (90.3%) | 49 (94.2%) | <0.001 |
| Statin                  | 11 (29.7%) | 11 (35.5%) | 17 (32.7%) | 0.88   |
| Loop diuretics          | 26 (70.3%) | 26 (83.9%) | 32 (61.5%) | 0.10   |
| Digoxin                 | 9 (24.3%)  | 11 (35.5%) | 20 (38.5%) | 0.36   |
| Antibiotics*            | 23 (62.2%) | 8 (25.8%)  | 12 (23.1%) | <0.001 |

LVAD, left ventricular assist device; BMI, body mass index; AST, aspartate transaminase; ALT, alanine transaminase, LDH, lactate dehydrogenase; NT-proBNP, N-terminal prohormone B-type natriuretic peptide; Cr, Creatinine; CysC, Cystatin C; eGFR, estimated glomerular filtration rate; TNF-α, tumor necrosis factor alpha; sCD 14, soluble CD14; IL-6, interleukin-6; CRP, C-reactive

protein; ET-1, endothelin-1; LPS, lipopolysaccharide; ASA, acetylsalicylic acid; ACE, angiotensin-converting enzyme; ARB, angiotensin receptor blocker. Data presented n (%) or mean  $\pm$  SD as appropriate, unless otherwise noted.

\*Antibiotic use is defined as any antibiotic use that was indicated for infection that was estimated to have occurred 1 month before stool collection

**Supplemental Table III: Baseline Characteristics of HT Patients Providing Stool Samples**

| Study cohorts                                   | HT<br>(1wk) | HT<br>(1mo) | HT<br>(3mo) | HT<br>(>6mo) | P-value |
|-------------------------------------------------|-------------|-------------|-------------|--------------|---------|
| Number of samples (N=110)                       | 13          | 12          | 13          | 72           |         |
| <b>Demographic and clinical characteristics</b> |             |             |             |              |         |
| Age, (years)                                    | 54.9 ± 10.2 | 54.8 ± 11.0 | 51.5 ± 12.1 | 57.4 ± 12.2  | <0.001  |
| Male                                            | 12 (92.3%)  | 11 (91.7%)  | 12 (92.3%)  | 59 (81.9%)   | 0.56    |
| Race                                            |             |             |             |              | 0.88    |
| White                                           | 7 (53.8%)   | 5 (41.7%)   | 8 (61.5%)   | 37 (51.4%)   |         |
| Black                                           | 3 (23.1%)   | 6 (50.0%)   | 2 (15.4%)   | 21 (29.2%)   |         |
| Hispanic                                        | 2 (15.4%)   | 1 (8.3%)    | 2 (15.4%)   | 9 (12.5%)    |         |
| Other                                           | 1 (7.7%)    | 0 (0.0%)    | 1 (7.7%)    | 5 (6.9%)     |         |
| Smoking                                         | 9 (69.2%)   | 6 (50.0%)   | 5 (38.5%)   | 33 (45.8%)   | 0.40    |
| Etiology, Ischemic                              | 6 (46.2%)   | 4 (33.3%)   | 5 (38.5%)   | 35 (48.6%)   | 0.74    |
| Hypertension                                    | 6 (46.2%)   | 8 (66.7%)   | 8 (61.5%)   | 63 (87.5%)   | 0.003   |
| Diabetes                                        | 5 (38.5%)   | 4 (33.3%)   | 4 (30.8%)   | 36 (50.0%)   | 0.45    |
| Atrial Fib/flutter                              | 5 (38.5%)   | 4 (33.3%)   | 5 (38.5%)   | 21 (29.2%)   | 0.86    |
| Stroke                                          | 4 (30.8%)   | 4 (33.3%)   | 3 (23.1%)   | 10 (13.9%)   | 0.25    |
| Time after HT, months                           | 0.30        | 0.84        | 2.63        | 39.4         | <0.001  |
| Median [IQR]                                    | [0.3,0.3]   | [0.7,1.2]   | [2.23 3.1]  | [9.3, 89.3]  |         |

| <b>Laboratory parameters</b>                     |             |             |             |              |        |
|--------------------------------------------------|-------------|-------------|-------------|--------------|--------|
| BUN (mg/dl)                                      | 32.7 ± 15.6 | 35.2 ± 13.9 | 32.0 ± 14.9 | 26.0 ± 10.0  | 0.005  |
| Serum Cr (mg/dl)                                 | 1.1 ± 0.3   | 1.4 ± 0.4   | 1.3 ± 0.3   | 1.6 ± 1.0    | 0.09   |
| Serum CysC (mg/l)                                | 1.6 ± 0.6   | 1.5 ± 0.5   | 1.3 ± 0.3   | 1.52 ± 0.8   | 0.56   |
| eGFR <sub>Cr</sub> (ml/min/1.73m <sup>2</sup> )  | 80.3 ± 30.5 | 65.2 ± 24.0 | 62.0 ± 16.8 | 59.5 ± 39.7  | 0.02   |
| eGFR <sub>Cys</sub> (ml/min/1.73m <sup>2</sup> ) | 52.9 ± 24.1 | 52.4 ± 22.9 | 59.5 ± 20.3 | 55.2 ± 24.7  | 0.08   |
| Na (mmol/l)                                      | 137.3 ± 2.2 | 139.4 ± 2.9 | 139.4 ± 3.7 | 141.7 ± 2.8  | <0.001 |
| AST (U/L)                                        | 21.6 ± 8.8  | 24.3 ± 8.4  | 22.4 ± 9.2  | 24.6 ± 15.5  | 0.76   |
| ALT (U/L)                                        | 24.2 ± 13.1 | 44.5 ± 25.2 | 36.4 ± 33.8 | 21.7 ± 12.9  | <0.001 |
| Total Bilirubin (mg/dl)                          | 0.6 ± 0.3   | 0.4 ± 0.2   | 0.4 ± 0.2   | 0.6 ± 0.4    | 0.50   |
| LDH (U/L)                                        | 707 ± 293.4 | 315 ± 92.3  | 308 ± 77.0  | 249.0 ± 86.6 | <0.001 |
| <b>Biomarkers</b>                                |             |             |             |              |        |
| In-CRP (mg/L)                                    | 2.3 ± 1.3   | 0.6 ± 1.4   | 0.4 ± 1.7   | 1.1 ± 1.2    | <0.001 |
| In-IL-6 (pg/mL)                                  | 2.3 ± 0.7   | 1.6 ± 0.8   | 1.3 ± 1.0   | 1.3 ± 0.9    | <0.001 |
| In-TNF-α (pg/mL)                                 | 0.2 ± 0.4   | 0.1 ± 0.4   | 0.2 ± 0.5   | 0.5 ± 0.5    | 0.002  |
| In-ET-1 (pg/mL)                                  | 1.0 ± 0.4   | 0.8 ± 0.5   | 0.9 ± 0.6   | 0.7 ± 0.5    | 0.18   |
| In-Adiponectin (ng/mL)                           | 9.6 ± 0.8   | 9.7 ± 0.5   | 9.4 ± 0.7   | 9.2 ± 0.6    | 0.005  |
| In-Isoprostane (pg/mL)                           | 4.1 ± 0.3   | 4.1 ± 0.3   | 4.5 ± 0.3   | 4.4 ± 0.5    | 0.02   |
| In-sCD14 (ng/mL)                                 | 7.1 ± 0.4   | 7.2 ± 0.4   | 7.2 ± 0.3   | 7.3 ± 0.3    | 0.17   |
| LPS (EU/mL)                                      | 0.5 ± 0.2   | 0.4 ± 0.2   | 0.4 ± 0.1   | 0.4 ± 0.2    | 0.13   |
| <b>Medications</b>                               |             |             |             |              |        |
| ASA                                              | 3 (23.1%)   | 10 (83.3%)  | 12 (92.3%)  | 65 (90.3%)   | <0.001 |

|                            |             |             |             |            |        |
|----------------------------|-------------|-------------|-------------|------------|--------|
| Coumadin                   | 0 (0.0%)    | 0 (0.0%)    | 0 (0.0%)    | 4 (5.6%)   | 0.53   |
| ACE inhibitors             | 0 (0.0%)    | 0 (0.0%)    | 0 (0.0%)    | 5 (6.9%)   | 0.43   |
| ARB                        | 0 (0.0%)    | 0 (0.0%)    | 0 (0.0%)    | 16 (22.2%) | 0.02   |
| Aldosterone<br>Antagonists | 0 (0.0%)    | 0 (0.0%)    | 0 (0.0%)    | 3 (4.2%)   | 0.65   |
| β-blockers                 | 0 (0.0%)    | 2 (16.7%)   | 0 (0.0%)    | 17 (23.6%) | 0.06   |
| Statin                     | 5 (38.5%)   | 12 (100.0%) | 11 (84.6%)  | 60 (83.3%) | 0.001  |
| Loop diuretics             | 4 (30.8%)   | 3 (25.0%)   | 7 (53.8%)   | 17 (23.6%) | 0.17   |
| Antibiotics*               | 13 (100.0%) | 12 (100.0%) | 13 (100.0%) | 21 (29.2%) | <0.001 |
| <b>Immunosuppression</b>   |             |             |             |            |        |
| Tacrolimus                 | 12 (92.3%)  | 12 (100.0%) | 13 (100.0%) | 53 (73.6%) | 0.02   |
| Cyclosporine               | 0 (0.0%)    | 0 (0.0%)    | 0 (0.0%)    | 15 (20.8%) | 0.03   |
| Prednisone                 | 11 (84.6%)  | 12 (100.0%) | 13 (100.0%) | 52 (72.2%) | 0.03   |
| Sirolimus                  | 0 (0.0%)    | 0 (0.0%)    | 0 (0.0%)    | 1 (1.4%)   | 0.91   |
| Everolimus                 | 0 (0.0%)    | 0 (0.0%)    | 0 (0.0%)    | 3 (4.2%)   | 0.65   |
| Mycophenolate Mofetil      | 11 (84.6%)  | 11 (91.7%)  | 11 (84.6) % | 53 (73.6%) | 0.43   |

HT, heart transplant; BMI, body mass index; AST, aspartate transaminase; ALT, alanine transaminase, LDH, lactate dehydrogenase; NT-proBNP, N-terminal prohormone B-type natriuretic peptide; Cr, Creatinine; CysC, Cystatin C; eGFR, estimated glomerular filtration rate; TNF- $\alpha$ , tumor necrosis factor alpha; sCD 14, soluble CD14; IL-6, interleukin-6; CRP, C-reactive protein; ET-1, endothelin-1; LPS, lipopolysaccharide; ASA, acetylsalicylic acid; ACE, angiotensin-converting enzyme; ARB, angiotensin receptor blocker; NA, not available.

Data presented n (%) or mean (SE) as appropriate, unless otherwise noted.

\*Antibiotic use is defined as any antibiotic use that was indicated for infection or prophylaxis as per HT protocol that was estimated to have occurred 1 month before stool collection.

**Supplemental Table IV: Mean In-TMAO Values Before and After LVAD Among Patients With Repeated Longitudinal Measures**

| Variables                            |                                      | LVAD<br>1 Month      | LVAD<br>3-6 Months    | LVAD<br>>6 Months       |
|--------------------------------------|--------------------------------------|----------------------|-----------------------|-------------------------|
| Crude                                | Number of Samples                    | 49                   | 37                    | 19                      |
|                                      | Median Time Pre-LVAD<br>[IQR], days  | 3<br>[1, 7]          | 3<br>[1, 6]           | 2<br>[1, 6]             |
|                                      | Median Time Post-LVAD<br>[IQR], days | 19<br>[15, 25]       | 143<br>[105, 188]     | 315<br>[291.5, 330.5]   |
|                                      | In-TMAO Mean (95% CI )<br>Pre-LVAD   | 1.85<br>(1.49, 2.22) | 1.96<br>(1.71, 2.21)  | 1.80<br>(1.5, 2.09)     |
|                                      | In-TMAO Mean (95% CI )<br>Post-LVAD  | 1.41<br>(1.05, 1.78) | 1.65<br>(1.40, 1.90)  | 1.79<br>(1.5, 2.08)     |
|                                      | p-value                              | 0.0669               | 0.0198                | 0.9842                  |
|                                      | eGFR <sub>Cr</sub><br>Adjusted       | Number of Samples    | 32                    | 27                      |
| Median Time Pre-LVAD<br>[IQR], days  |                                      | 3<br>[1, 9.5]        | 2<br>[1, 6]           | 3<br>[1, 6.25]          |
| Median Time Post-LVAD<br>[IQR], days |                                      | 19<br>[15, 25]       | 151<br>[104.5, 187.5] | 315.5<br>[285.8, 344.3] |
| In-TMAO Mean (95% CI )<br>Pre-LVAD   |                                      | 1.80<br>(1.37, 2.23) | 1.94<br>(1.69, 2.18)  | 1.84<br>(1.47, 2.21)    |
| In-TMAO Mean (95% CI )<br>Post-LVAD  |                                      | 1.27<br>(0.84, 1.70) | 1.68<br>(1.43, 1.93)  | 1.93<br>(1.56, 2.31)    |
| p-value                              |                                      | 0.0579               | 0.0516                | 0.6414                  |

|                               |                              |               |               |                |
|-------------------------------|------------------------------|---------------|---------------|----------------|
| <b>eGFR<sub>Cys</sub></b>     | <b>Number of Samples</b>     | 27            | 20            | 8              |
| <b>Adjusted</b>               | <b>Median Time Pre-LVAD</b>  | 3             | 2             | 4              |
|                               | <b>[IQI], days</b>           | [1, 7.5]      | [1, 6]        | [1.75, 6.50]   |
|                               | <b>Median Time Post-LVAD</b> | 20            | 117.5         | 314            |
|                               | <b>[IQI], days</b>           | [16, 25]      | [101.3,156.8] | [285.5, 322.8] |
|                               | <b>In-TMAO Mean 95% CI )</b> | 1.98          | 2.10          | 2.08           |
|                               | <b>Pre-LVAD</b>              | (1.49, 2.46)  | (1.79, 2.40)  | (1.66, 2.50)   |
| <b>In-TMAO Mean (95% CI )</b> | 1.19                         | 1.68          | 1.79          |                |
| <b>Post-LVAD</b>              | (0.71, 1.67)                 | (1.38, 1.99)  | (1.37, 2.22)  |                |
| <b>p-value</b>                | <b>0.0154</b>                | <b>0.0226</b> | 0.3051        |                |

Means correspond to adjusted least-squared means. IQI, interquartile interval; LVAD, left ventricular assist device; SE, standard error



**Supplemental Table V: Mean In-TMAO Values Before and After HT Among Patients With Repeated Longitudinal Measures**

| Variables                |                                                  | HT<br>1 Week            | HT<br>1 Month        | HT<br>3-6 Months     | HT<br>>6 Months      |
|--------------------------|--------------------------------------------------|-------------------------|----------------------|----------------------|----------------------|
| <b>Crude</b>             | <b>Number of Samples</b>                         | 17                      | 20                   | 20                   | 19                   |
|                          | <b>Median Time Pre-HT</b><br><b>[IQI], days</b>  | 57<br>[22,134]          | 64<br>[20.5,140.3]   | 54<br>[14.3,140.3]   | 51<br>[13.5,160.5]   |
|                          | <b>Median Time Post-HT</b><br><b>[IQI], days</b> | 8<br>[7, 10]            | 21<br>[19, 28]       | 85<br>[57, 111.5]    | 147<br>[141.5,169]   |
|                          | <b>In-TMAO Mean (95%<br/>CI)<br/>Pre-HT</b>      | 1.94<br>(1.38,<br>2.51) | 1.98<br>(1.32, 2.64) | 1.99<br>(1.57, 2.41) | 1.98<br>(1.37, 2.58) |
|                          | <b>In-TMAO Mean (95%<br/>CI)<br/>Post-HT</b>     | 0.74<br>(0.17,<br>1.31) | 1.22<br>(0.56, 1.88) | 1.90<br>(1.48, 2.33) | 1.54<br>(0.94, 2.14) |
|                          | <b>p-value</b>                                   | <b>0.0004</b>           | 0.0536               | 0.7075               | 0.2169               |
| <b>eGFR<sub>Cr</sub></b> | <b>Number of Samples</b>                         | 11                      | 14                   | 13                   | 9                    |
| <b>Adjusted</b>          | <b>Median Time Pre-HT</b><br><b>[IQI], days</b>  | 37<br>[16.5,<br>67.5]   | 36.5<br>[12.3, 79.5] | 16<br>[11, 62]       | 16<br>[12, 66]       |
|                          | <b>Median Time Post-HT</b><br><b>[IQI], days</b> | 9<br>[8, 10]            | 22.5<br>[19.3, 28.3] | 110<br>[57, 113]     | 169<br>[141, 180]    |
|                          | <b>In-TMAO Mean (95%<br/>CI)<br/>Pre-HT</b>      | 2.22<br>(1.57,<br>2.87) | 2.00<br>(1.45, 2.56) | 2.23<br>(1.88, 2.78) | 2.19<br>(1.27, 3.11) |

|                                              |                                        |                       |                       |                      |                         |
|----------------------------------------------|----------------------------------------|-----------------------|-----------------------|----------------------|-------------------------|
|                                              | <b>In-TMAO Mean (95% CI)</b>           | 0.94<br>(0.29, 1.59)  | 0.73<br>(0.02, 1.44)  | 1.77<br>(1.32, 2.23) | 1.55<br>(0.63, 2.47)    |
|                                              | <b>p-value</b>                         | 0.0006                | 0.0008                | 0.0773               | 0.2560                  |
| <b>eGFR<sub>Cys</sub></b><br><b>Adjusted</b> | <b>Number of Samples</b>               | 13                    | 15                    | 15                   | 14                      |
|                                              | <b>Median Time Pre-HT [IQI], days</b>  | 51<br>[22, 201]       | 62<br>[13.5, 160.5]   | 51<br>[13, 160.5]    | 44<br>[12, 111]         |
|                                              | <b>Median Time Post-HT [IQI], days</b> | 9<br>[7, 10]          | 21<br>[19, 28]        | 59<br>[56.5, 110.5]  | 146<br>[141.25, 167.25] |
|                                              | <b>In-TMAO Mean (95% CI) Pre-HT</b>    | 2.32<br>(1.58, 3.05)  | 2.16<br>(1.49, 2.82)  | 2.05<br>(1.53, 2.56) | 2.04<br>(1.54, 2.54)    |
|                                              | <b>In-TMAO Mean (95% CI) Post-HT</b>   | 0.39<br>(-0.34, 1.13) | 0.22<br>(-0.58, 1.02) | 1.77<br>(1.26, 2.29) | 1.88<br>(1.38, 2.37)    |
|                                              | <b>p-value</b>                         | 0.0001                | <0.0001               | 0.2949               | 0.5097                  |

Means correspond to adjusted least-squared means. IQI, interquartile interval; HT, heart transplant; SE, standard error

**Supplemental Table VI: Association Between In-TMAO Levels and Biomarkers of Inflammation, Endotoxemia and Oxidative Stress**

| Dependent Variables | M0                     |         |     | M3                     |         |     | M4                     |         |     |
|---------------------|------------------------|---------|-----|------------------------|---------|-----|------------------------|---------|-----|
|                     | Regression Coefficient | p-value | N   | Regression Coefficient | p-value | N   | Regression Coefficient | p-value | N   |
| In-Adiponectin      | 0.042                  | 0.0947  | 606 | 0.064                  | 0.0465  | 476 | 0.022                  | 0.4879  | 456 |
| In-TNF-alpha        | 0.077                  | <.0001  | 605 | 0.024                  | 0.2718  | 474 | 0.019                  | 0.3128  | 457 |
| In-sCD14            | 0.053                  | 0.0004  | 605 | 0.027                  | 0.1323  | 475 | 0.015                  | 0.3610  | 454 |
| In-IL6              | 0.001                  | 0.9721  | 602 | 0.007                  | 0.8945  | 470 | -0.092                 | 0.0622  | 452 |
| In-Isoprostane      | 0.041                  | 0.0554  | 440 | -0.039                 | 0.0895  | 393 | -0.027                 | 0.2438  | 385 |
| In-CRP              | -0.092                 | 0.1285  | 596 | -0.071                 | 0.3514  | 468 | -0.189                 | 0.0124  | 445 |
| In-ET-1             | 0.037                  | 0.0579  | 605 | 0.029                  | 0.2366  | 474 | 0.014                  | 0.5789  | 455 |
| In-LPS              | -0.011                 | 0.6482  | 383 | 0.029                  | 0.3084  | 342 | 0.005                  | 0.8444  | 334 |

TNF-  $\alpha$ , tumor necrosis factor alpha; sCD14 soluble CD14; IL-6, interleukin-6; CRP, C-reactive protein; ET-1 endothelin-1; LPS, lipopolysaccharide; **Model(M)0**, unadjusted; **M3**, adjusted for age, sex, race/ethnicity, antibiotics use one month prior to stool collection, and serum creatinine estimated glomerular filtration rate (eGFR<sub>Cr</sub>); **M4**, adjusted for age, sex, race/ethnicity, antibiotics use one month prior to stool collection, and Cystatin C estimated glomerular filtration rate (eGFR<sub>Cys</sub>). Mixed models with random intercepts were used to account for repeated sampling. N corresponds to the number of observations included in each model, depending on the availability of eGFR<sub>Cr</sub>, eGFR<sub>Cys</sub>, and blood biomarker data.

**Supplemental Table VII: Differences in Unadjusted and Adjusted Mean Values of Shannon Index and Number of Observed ESVs Between Select Groups of Patients**

| Patient Comparison Groups | A) Shannon Index    |                     | B) # Observed ESVs    |                       |
|---------------------------|---------------------|---------------------|-----------------------|-----------------------|
|                           | M0                  | M2                  | M0                    | M2                    |
| Class I - LVAD 1mo        | 1.06<br>(p=0.0009)  | 0.78<br>(p=0.0594)  | 321.69<br>(p=0.0012)  | 241.46<br>(p=0.053)   |
| Class I - HT 1wk          | 1.41<br>(p<.0001)   | 1.00<br>(p=0.0185)  | 342.19<br>(p=0.0036)  | 235.92<br>(p=0.1875)  |
| Class I - HT 1mo          | 1.10<br>(p=0.0062)  | 0.72<br>(p=0.2953)  | 334.44<br>(p=0.0063)  | 235.39<br>(p=0.2142)  |
| Class II - LVAD 1mo       | 0.59<br>(p=0.0035)  | 0.38<br>(p=0.2483)  | 168.58<br>(p=0.0099)  | 111.89<br>(p=0.3112)  |
| Class II - HT 1wk         | 0.94<br>(p=0.0002)  | 0.60<br>(p=0.1082)  | 189.09<br>(p=0.0737)  | 106.34<br>(p=0.8305)  |
| Class III - LVAD 1mo      | 0.55<br>(p=0.0074)  | 0.36<br>(p=0.2986)  | 189.31<br>(p=0.0012)  | 142.46<br>(p=0.051)   |
| Class III - HT 1wk        | 0.90<br>(p=0.0004)  | 0.58<br>(p=0.1276)  | 209.82<br>(p=0.0237)  | 136.92<br>(p=0.4925)  |
| Class III - HT 1mo        | 0.58<br>(p=0.1381)  | 0.31<br>(p=0.9249)  | 202.06<br>(p=0.0484)  | 136.39<br>(p=0.5507)  |
| Class IV - HT 1wk         | 0.70<br>(p=0.0202)  | 0.40<br>(p=0.6528)  | 131.29<br>(p=0.5306)  | 55.06<br>(p=0.9982)   |
| LVAD 1mo - LVAD 3-6mo     | -0.63<br>(p=0.0008) | -0.47<br>(p=0.0352) | -168.62<br>(p=0.0069) | -127.25<br>(p=0.1025) |
| LVAD 1mo - LVAD >6mo      | -0.55<br>(p=0.0012) | -0.37<br>(p=0.1251) | -153.62<br>(p=0.0051) | -105.14<br>(p=0.1966) |
| LVAD 1mo - HT >6mo        | -0.48<br>(p=0.0042) | -0.31<br>(p=0.2688) | -124.89<br>(p=0.0325) | -75.95<br>(p=0.5925)  |
| LVAD 3-6mo - HT 1wk       | 0.98<br>(p<.0001)   | 0.70<br>(p=0.0213)  | 189.13<br>(p=0.067)   | 121.71<br>(p=0.6398)  |

|                     |                     |                     |                       |                      |
|---------------------|---------------------|---------------------|-----------------------|----------------------|
| LVAD 3-6mo - HT 1mo | 0.66<br>(p=0.0466)  | 0.42<br>(p=0.6123)  | 181.37<br>(p=0.1189)  | 121.18<br>(p=0.6900) |
| LVAD >6mo - HT 1wk  | 0.89<br>(p=0.0001)  | 0.59<br>(p=0.0645)  | 174.13<br>(p=0.0782)  | 99.60<br>(p=0.8106)  |
| HT 1wk - HT >6mo    | -0.82<br>(p=0.0004) | -0.53<br>(p=0.1229) | -145.39<br>(p=0.2279) | -70.41<br>(p=0.9722) |

Only group differences visualized in Figure 4 that were statistically significant ( $p < 0.05$ ) are presented. Results are present as the difference in mean A) Shannon Index or B) Observed ESVs between the patient groups in the first column; Results from linear mixed models unadjusted (**M0**) and adjusted for age, sex, race/ethnicity, and antibiotics use one month prior to stool collection (**M2**);

HF, heart failure; LVAD, left ventricular assist device; HT, heart transplantation.
